# Supplementary material for: A combinatorial code of neurexin-3 alternative splicing controls inhibitory synapses via a trans-synaptic dystroglycan signaling loop
Source: PubMed Central journal article supplement (PMC10063607; doi:10.1038/s41467-023-36872-8), 2023-03-30
Supplement: 41467_2023_36872_MOESM4_ESM.pdf [file 41467_2023_36872_MOESM4_ESM.pdf]

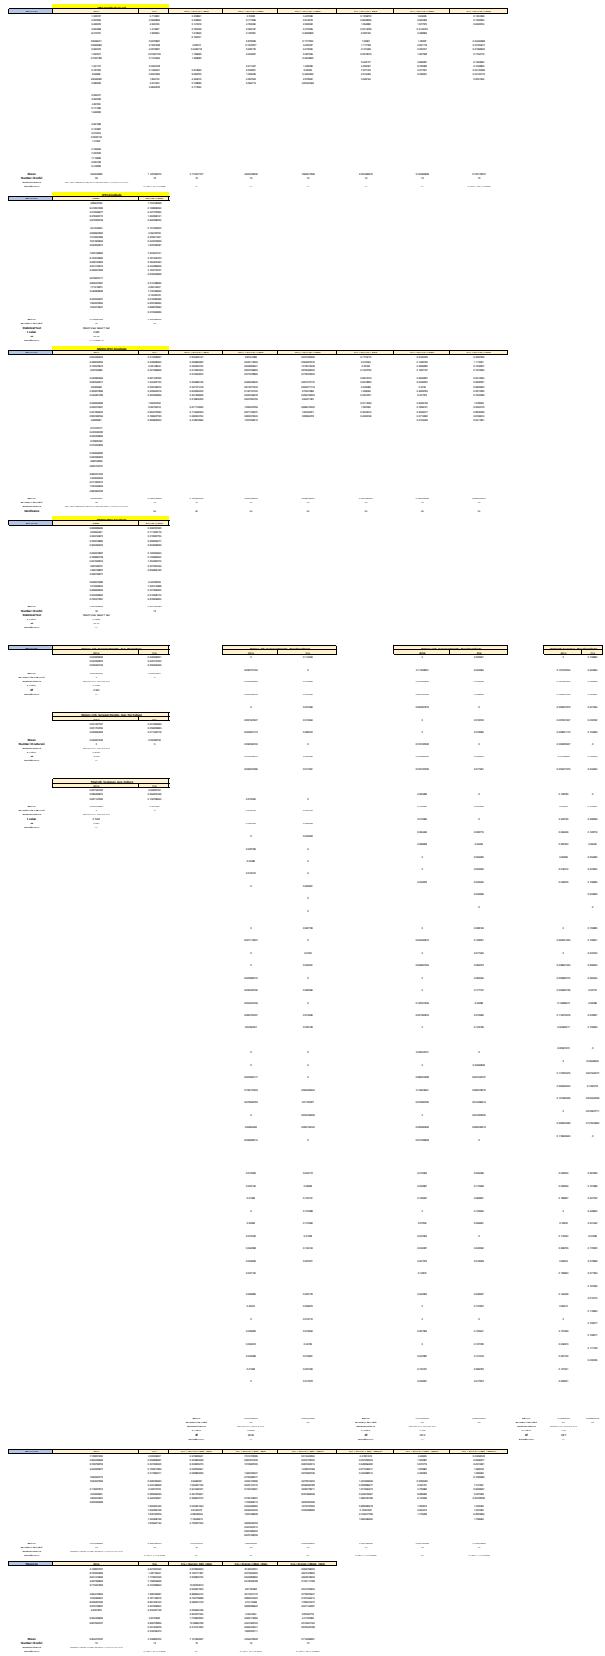

| Figure 2c        | IPSC Amplitude                                 |                       |                     |                          |                          |
|------------------|------------------------------------------------|-----------------------|---------------------|--------------------------|--------------------------|
|                  | dCre                                           | Cre                   | Cre + Nrnx3a (-SS4) | Cre + Nrnx3a (LNS4-LNS6) | Cre + Nrnx3a (LNS1-LNS4) |
|                  | 1.878397583                                    | 0.372478027           | 3.935572998         | 0.084747612              | 5.267785645              |
|                  | 5.794429199                                    | 0.794836426           | 3.807510986         | 0.194543289              | 1.907627197              |
|                  | 0.894480286                                    | 1.380685059           | 1.49530481          | 0.446087555              | 0.6237901                |
|                  | 5.245019531                                    | 5.650089844           | 4.662871582         | 0.920987366              | 4.714319824              |
|                  |                                                | 0.591476196           | 7.262024902         | 0.118982117              | 7.95752832               |
|                  | 4.927504395                                    | 0.032868874           | 4.601295898         | 0.219041168              | 1.520331665              |
|                  | 4.504977051                                    | 0.122413185           | 1.351060913         | 1.0060495                | 2.651093018              |
|                  | 1.323639771                                    | 0.288438599           | 7.58114502          | 0.724992615              | 0.709278564              |
|                  | 4.025512695                                    | 0.040847393           | 5.081791504         | 1.107179688              | 2.391909668              |
|                  | 9.749810547                                    | 0.198694687           | 0.528076721         | 0.321287048              | 6.24501123               |
|                  | 0.553428223                                    | 0.257778564           |                     | 0.076472359              | 9.093652344              |
|                  | 1.923399048                                    | 0.725104797           |                     | 0.502667694              | 3.482282471              |
|                  | 6.204882813                                    | 0.943583984           |                     | 0.090415604              | 2.928464355              |
|                  | 4.113476074                                    | 5.684670898           |                     | 4.848932129              | 8.100895996              |
|                  | 5.459125                                       | 2.19826123            |                     | 0.018875826              | 2.741332275              |
| Mean             | 4.042720158                                    | 1.285481851           | 4.030665533         | 0.712084105              | 4.022353511              |
| Number (# cells) | 14                                             | 15                    | 10                  | 15                       | 15                       |
| Statistical Test | ANOVA with Dunnett's Multiple comparisons test |                       |                     |                          |                          |
| Significance     |                                                | to dCre, ** or 0.0047 | ns                  | to dCre, *** or 0.0005   | ns                       |

| Figure 2f        | IPSC Amplitude                                 |                        |                     |                            |                          |
|------------------|------------------------------------------------|------------------------|---------------------|----------------------------|--------------------------|
|                  | dCre                                           | Cre                    | Cre + Nrnx3a (-SS4) | Cre + Nrnx3a (LNS2/3-only) | Cre + Nrnx3a (LNS2-only) |
|                  | 0.785692322                                    | 0.387728516            | 1.122364136         | 5.786537109                | 4.743918457              |
|                  | 3.587024902                                    | 1.143088867            | 6.007285645         | 1.671965454                | 11.80621484              |
|                  | 9.452959961                                    | 4.14034668             | 1.61983728          | 9.397269531                | 4.07598877               |
|                  | 4.60894043                                     | 0.044391834            | 5.159187012         | 6.176229492                | 4.21179541               |
|                  | 7.380458496                                    | 0.020140263            | 2.636102783         | 1.918957275                | 3.855185059              |
|                  | 12.42824121                                    | 7.956678711            | 2.636219971         | 12.20743262                | 2.10840332               |
|                  | 1.617584229                                    | 0.181040451            | 10.22994629         | 1.535411133                | 6.234746094              |
|                  | 5.631896973                                    | 1.97139856             | 6.554281738         | 2.549123291                | 4.081328613              |
|                  | 5.50968457                                     | 0.753565491            | 7.999151855         | 3.142222656                | 7.790749512              |
|                  | 7.648881348                                    | 2.853336914            | 2.290608398         | 5.764934082                | 12.49784766              |
|                  | 7.243889648                                    | 2.134730225            | 3.952739502         | 2.064831055                | 5.605489746              |
|                  | 1.673033813                                    | 0.082260223            | 0.716276001         | 4.443207031                | 4.680748047              |
|                  | 3.737975342                                    | 0.168303391            | 6.779841309         | 5.776748535                | 3.65961499               |
|                  | 3.903456055                                    | 2.590674805            | 3.476205566         | 1.791719849                | 6.68042041               |
|                  |                                                | 0.53862561             | 4.490854004         | 8.86315918                 |                          |
|                  |                                                | 0.445560425            | 4.730633301         |                            |                          |
|                  |                                                | 5.383587891            | 12.25826758         |                            |                          |
|                  |                                                | 1.393002686            | 1.725601196         |                            |                          |
|                  |                                                | 0.598703308            | 6.535405273         |                            |                          |
|                  |                                                | 0.125680862            | 1.734318115         |                            |                          |
|                  |                                                | 4.091167725            | 0.943911194         |                            |                          |
|                  |                                                | 0.189941406            | 8.049019531         |                            |                          |
|                  |                                                | 1.30984729             |                     |                            |                          |
|                  |                                                | 1.825361938            |                     |                            |                          |
|                  |                                                | 2.967205322            |                     |                            |                          |
|                  |                                                | 0.407705048            |                     |                            |                          |
|                  |                                                | 0.494904663            |                     |                            |                          |
|                  |                                                | 0.279454132            |                     |                            |                          |
|                  |                                                | 0.317594727            |                     |                            |                          |
|                  |                                                | 0.238563858            |                     |                            |                          |
| Mean             | 5.372122807                                    | 1.501153061            | 4.620366258         | 4.872649886                | 5.858032209              |
| Number (# cells) | 14                                             | 30                     | 22                  | 15                         | 14                       |
| Statistical Test | ANOVA with Dunnett's Multiple comparisons test |                        |                     |                            |                          |
| Significance     |                                                | to dCre, *** or 0.0003 | ns                  | ns                         | ns                       |

| Figure 2h        | IPSC Amplitude                                 |                |                                |                                 |                                  |
|------------------|------------------------------------------------|----------------|--------------------------------|---------------------------------|----------------------------------|
|                  | dCre                                           | Cre            | Cre + Nrnx3a (LNS2-only, -SS2) | Cre + Nrnx3a (LNS2-only, +SS2a) | Cre + Nrnx3a (LNS2-only, +SS2ab) |
|                  | 5964.409668                                    | 4606.71        | 7361.821289                    | 3639.122803                     | 3097.981934                      |
|                  | 4745.520508                                    | 5399.395       | 11019.78516                    | 3819.175049                     | 7974.344238                      |
|                  | 11629.30176                                    | 6389.247       | 7548.390625                    | 1165.312012                     | 8083.233398                      |
|                  | 5912.60791                                     | 4517.534       | 5775.598145                    | 4328.794922                     | 5331.562988                      |
|                  | 6221.105957                                    |                | 6929.060059                    | 6349.186523                     | 6319.923828                      |
|                  | 13302.37695                                    | 536.1362       | 11310.85352                    | 499.245544                      | 266.343872                       |
|                  | 4464.449707                                    | 1430.944       | 4805.038574                    | 8412.263672                     | 174.491028                       |
|                  | 4620.115723                                    | 4690.004       | 8723.996094                    | 298.91629                       | 59.955173                        |
|                  |                                                |                |                                | 1489.80542                      | 7368.539063                      |
|                  |                                                |                |                                | 2932.223877                     | 3609.56665                       |
|                  | 2691.438721                                    | 174.148        | 2283.496094                    | 506.367737                      | 2053.677246                      |
|                  | 5187.203613                                    | 308.1678       | 1365.148071                    | 1636.432861                     | 629.925537                       |
|                  |                                                |                |                                | 411.405151                      | 1003.198242                      |
|                  |                                                |                |                                | 570.505127                      | 2115.99707                       |
|                  |                                                |                |                                |                                 | 699.965393                       |
| Mean             | 6473.853052                                    | 3116.920667    | 6712.318763                    | 2575.625499                     | 3252.580377                      |
| Number (# cells) | 10                                             | 9              | 10                             | 14                              | 15                               |
| Statistical Test | ANOVA with Dunnett's Multiple comparisons test |                |                                |                                 |                                  |
| Significance     |                                                | ns, p = 0.0511 | ns                             | ** , p = 0.0078                 | * , p = 0.0314                   |







| Figure 6a                | Ctrl                          | Dag1 gRNA   |
|--------------------------|-------------------------------|-------------|
|                          | 100                           | 39.78243606 |
|                          | 100                           | 41.18625945 |
|                          | 100                           | 31.15536592 |
| Average Count (cultures) | 100                           | 37.37568714 |
| Statistical Test         | two-tailed, one sample t test |             |
| Tvalue                   | 19.97                         |             |
| df                       | 2                             |             |
| Significance             | **, p = 0.0025                |             |

| Figure 6c             | Ctrl                                               | Dag1 gRNA   |
|-----------------------|----------------------------------------------------|-------------|
|                       | 1.393716675                                        | 4.538832031 |
|                       | 2.448588967                                        | 0.374032013 |
|                       | 1.557436279                                        | 0.319219849 |
|                       | 6.824246094                                        | 1.741697021 |
|                       | 3.690708008                                        | 0.605207947 |
|                       | 1.576948242                                        | 0.570067383 |
|                       | 5.698196777                                        | 2.974362334 |
|                       | 2.13142041                                         | 1.538900391 |
|                       | 4.416081543                                        | 3.182121338 |
|                       | 4.263709961                                        | 0.683313416 |
|                       | 0.848329895                                        | 2.760336914 |
|                       | 1.689602783                                        | 1.110234009 |
|                       | 6.952677734                                        | 0.441584839 |
| Average Count (cells) | 3.498358713                                        | 1.603070183 |
| Statistical Test      | unpaired two-tailed T-test with Welch's correction |             |
| Tvalue                | 2.439                                              |             |
| df                    | 18.69                                              |             |
| Significance          | *, p = 0.0249                                      |             |

| Figure 6e             | dCre                                                                        | dCre + Dag1 gRNA | Cre         | Cre + Dag1 gRNA |
|-----------------------|-----------------------------------------------------------------------------|------------------|-------------|-----------------|
|                       | 1.51827417                                                                  | 2.10462793       | 2.110289795 | 3.119438414     |
|                       | 3.787624268                                                                 | 0.245552733      | 0.368918573 | 4.967742188     |
|                       |                                                                             | 0.655594175      | 2.347226271 | 0.920279834     |
|                       |                                                                             | 0.498259551      | 1.312881528 | 1.540763447     |
|                       |                                                                             | 0.285121552      | 1.465384644 | 0.973251953     |
|                       | 5.331669922                                                                 | 0.73066095       | 8.572758859 | 3.184894531     |
|                       | 4.191088867                                                                 | 0.601045288      | 1.769262939 | 5.042607422     |
|                       | 5.6967334                                                                   | 0.25992604       | 2.769459473 | 1.875074219     |
|                       | 0.689091675                                                                 | 4.245503906      | 2.910873047 |                 |
|                       | 9.86595703                                                                  |                  | 0.152849976 |                 |
|                       | 4.40634668                                                                  | 3.223001221      | 2.037180176 | 5.77991748      |
|                       | 9.017279297                                                                 | 2.340318848      | 1.687684937 | 4.436753906     |
|                       | 6.38684226                                                                  | 0.480786571      | 2.844393311 | 5.753077637     |
|                       | 5.571657715                                                                 | 4.732151367      | 6.844233368 | 0.659419676     |
|                       | 6.601068848                                                                 | 2.016201172      | 0.380742035 | 0.409260254     |
| Average Count (cells) | 5.256267894                                                                 | 1.603272836      | 2.505934517 | 2.977253643     |
| Statistical Test      | 2-way ANOVA with Tukey's multiple comparisons test                          |                  |             |                 |
| df                    | 12                                                                          | 14               | 15          | 13              |
| Significance          | ***, p = 0.0004 (to dCre) **, p = 0.0096 (to dCre) ns, p = 0.0521 (to dCre) |                  |             |                 |

| Figure 6f             | dCre                                                                    | dCre + Dag1 gRNA | Cre         | Cre + Dag1 gRNA |
|-----------------------|-------------------------------------------------------------------------|------------------|-------------|-----------------|
|                       | 0.07399437                                                              | 0.152970875      | 0.105920813 | 0.189186156     |
|                       | 0.240058                                                                | 0.078600055      | 0.023582816 | 0.343229219     |
|                       |                                                                         | 0.276714656      | 0.235149234 | 0.049740852     |
|                       |                                                                         | 0.084741336      | 0.083423867 | 0.083755261     |
|                       |                                                                         | 0.024394848      | 0.062349836 | 0.097094117     |
|                       | 1.113047                                                                | 0.07453825       | 0.505035844 | 0.236606031     |
|                       | 0.2177181                                                               | 0.060650957      | 0.077243258 | 0.44477025      |
|                       | 0.430611                                                                | 0.008706488      | 0.203099038 | 0.255611781     |
|                       | 0.03278019                                                              | 0.341865844      | 0.05429418  |                 |
|                       | 1.353603                                                                |                  | 0.013444664 |                 |
|                       | 0.3251208                                                               | 0.328706344      | 0.149212828 | 0.57552875      |
|                       | 0.7693861                                                               | 0.150327672      | 0.073906609 | 0.320148438     |
|                       | 0.3028154                                                               | 0.027874043      | 0.138047297 | 0.482904125     |
|                       | 0.3496759                                                               | 0.408728156      | 0.406146375 | 0.046886703     |
|                       | 0.274544                                                                | 0.211028719      | 0.013951248 |                 |
| Average Count (cells) | 0.45668888                                                              | 0.159989232      | 0.14300792  | 0.280872142     |
| Statistical Test      | 2-way ANOVA with Tukey's multiple comparisons test                      |                  |             |                 |
| df                    | 12                                                                      | 14               | 15          | 12              |
| Significance          | *, p = 0.0123 (to dCre) **, p = 0.0063 (to dCre) ns, p = 4023 (to dCre) |                  |             |                 |

| Figure 6h             | NMDAR-EPSCs                                        |                  |             |                 |
|-----------------------|----------------------------------------------------|------------------|-------------|-----------------|
|                       | dCre                                               | dCre + Dag1 gRNA | Cre         | Cre + Dag1 gRNA |
|                       | 0.37112735                                         | 1.83625          | 0.813398804 | 0.076017822     |
|                       | 0.694535767                                        | 0.148152313      | 2.629472412 | 0.581522644     |
|                       | 0.816024912                                        | 0.905601609      | 0.617316675 | 1.580326359     |
|                       | 1.315511841                                        | 1.648802612      | 0.250404358 | 0.532439087     |
|                       | 0.057595222                                        | 0.062072693      | 0.078903465 | 0.045541519     |
|                       | 0.128634232                                        | 0.048939213      | 0.35528775  | 0.071145027     |
|                       | 0.096125938                                        | 0.093399841      |             | 0.185211075     |
|                       | 0.023359358                                        | 0.008191372      | 0.050013329 | 0.325438599     |
|                       | 0.167145096                                        | 0.008552102      | 0.015279064 | 0.11013488      |
|                       | 0.096614426                                        | 0.093797729      | 0.306264832 | 0.059980179     |
|                       | 0.075727943                                        |                  |             |                 |
| Average Count (cells) | 0.345242008                                        | 0.487980698      | 0.568137854 | 0.455675592     |
| Statistical Test      | 2-way ANOVA with Tukey's multiple comparisons test |                  |             |                 |
| df                    | 11                                                 | 10               | 9           | 10              |
| Significance          | ns ns ns ns                                        |                  |             |                 |

| Figure 6i             | AMPA-EPSCs                                         |                  |             |                 |
|-----------------------|----------------------------------------------------|------------------|-------------|-----------------|
|                       | dCre                                               | dCre + Dag1 gRNA | Cre         | Cre + Dag1 gRNA |
|                       | 2.358732666                                        | 2.915829346      | 0.583679503 | 0.979468201     |
|                       | 0.656214722                                        | 2.160535156      | 1.657297363 | 2.89213501      |
|                       | 1.105677812                                        | 1.045551147      | 5.009924805 | 1.786452637     |
|                       | 0.75789989                                         | 2.304394287      | 0.848229553 | 1.108194214     |
|                       | 0.741980042                                        | 0.805942688      | 0.534341003 | 1.164858887     |
|                       | 0.816252441                                        | 0.244198593      | 0.37730896  | 1.044040039     |
|                       | 0.30530304                                         | 0.283946869      | 0.644206543 | 0.468593994     |
|                       | 0.294131012                                        | 0.545852234      | 0.24519519  | 0.104488419     |
|                       |                                                    | 0.32795343       | 1.767139771 | 1.128227783     |
|                       | 0.883407043                                        | 0.689507324      | 0.629792236 | 0.425990571     |
|                       | 0.634854187                                        |                  | 0.313576599 |                 |
|                       | 0.922574707                                        |                  |             |                 |
| Average Count (cells) | 0.84352976                                         | 1.132371107      | 1.164607993 | 1.108041976     |
| Statistical Test      | 2-way ANOVA with Tukey's multiple comparisons test |                  |             |                 |
| df                    | 11                                                 | 10               | 11          | 10              |
| Significance          | ns ns ns ns                                        |                  |             |                 |

















| Newt 254 Inclusion |           |           | Newt 254 Inclusion |           |           | Newt 254 Inclusion 2 |           |            |
|--------------------|-----------|-----------|--------------------|-----------|-----------|----------------------|-----------|------------|
| Transect           | Number 1  | Number 2  | Transect           | Number 1  | Number 2  | Transect             | Number 1  | Number 2   |
| OB                 | 71.720875 | 73.444181 | OB                 | 88.203743 | 84.521521 | OB                   | 98.427009 | 98.250735  |
| Ca                 | 40.260268 | 41.138425 | Ca                 | 38.344878 | 38.800844 | Ca                   | 78.177099 | 80.814478  |
| Car                | 84.370478 | 84.108957 | Car                | 81.149241 | 82.130521 | Car                  | 89.051287 | 84.983787  |
| BS                 | 61.503871 | 60.940111 | BS                 | 61.143123 | 51.449078 | BS                   | 98.115148 | 98.205296  |
| Bys                | 60.380007 | 61.203195 | Bys                | 51.847466 | 53.670587 | Bys                  | 52.822365 | 36.47627   |
| Hpp                | 40.82897  | 42.899145 | Hpp                | 40.263763 | 41.150302 | Hpp                  | 55.622652 | 56.3281549 |

| OB       |            |           | Hpp       |          |            | OB         |            |          |            |            |            |            |
|----------|------------|-----------|-----------|----------|------------|------------|------------|----------|------------|------------|------------|------------|
| Newt 254 | 47.509941  | 47.730576 | 47.509941 | Newt 254 | 33.792243  | 37.88884   | 36.777151  | Newt 254 | 67.6337451 | 70.5328449 | 69.1133255 | 67.8828137 |
| Newt 254 | 40.682049  | 43.159953 | 40.026177 | Newt 254 | 26.2884525 | 36.4577755 | 37.5427854 | Newt 254 | 71.324378  | 75.628915  | 69.8024798 | 71.1623393 |
| Newt 254 | 78.8518467 | 78.410613 | 79.150171 | Newt 254 | 48.990823  | 58.02328   | 84.860195  | Newt 254 | 91.205928  | 94.807604  | 93.818761  | 93.548424  |

| Cell # | Cell Type         | Ni Transmitter | Cell # | % Total     | Cell Type  | Ni Transmitter | Cell # | % Total     |
|--------|-------------------|----------------|--------|-------------|------------|----------------|--------|-------------|
| 1      | GC-1 (a)          | VGAT           | 1814   | 8.85182888  | GC-1 (a)   | VGAT           | 1814   | 18.28424993 |
| 2      | GC-2 (b)          | VGAT           | 3608   | 18.93252071 | GC-2 (b)   | VGAT           | 3608   | 34.49849483 |
| 3      | GC-3 (c)          | VGAT           | 273    | 1.25483249  | GC-3 (c)   | VGAT           | 273    | 2.83794802  |
| 4      | GC-4 (d)          | VGAT           | 24     | 0.11689999  | GC-4 (d)   | VGAT           | 24     | 2.25234428  |
| 5      | GC-5 (e)          | VGAT           | 1589   | 7.81452476  | GC-5 (e)   | VGAT           | 1589   | 15.94382881 |
| 6      | GC-6 (f)          | VGAT           | 237    | 1.09989505  | GC-6 (f)   | VGAT           | 237    | 2.28424727  |
| 7      | GC-7 (g)          | VGAT           | 979    | 4.72413917  | GC-7 (g)   | VGAT           | 979    | 9.48648463  |
| 8      | PGC-1 (h)         | VGAT           | 1037   | 4.94889302  | PGC-1 (h)  | VGAT           | 1037   | 9.96381351  |
| 9      | PGC-2 (i)         | VGAT           | 337    | 1.61788718  | PGC-2 (i)  | VGAT           | 337    | 3.18140244  |
| 10     | PGC-3 (j)         | VGAT           | 279    | 1.33928474  | PGC-3 (j)  | VGAT           | 279    | 2.68526571  |
| 11     | EPN-2b (k)        | VGAT           | 161    | 0.76739844  | EPN-2b (k) | VGAT           | 161    | 1.53820263  |
| 12     | MTC-1 (l)         | vGLUT1         | 69     | 0.31788977  | None       |                |        | 19.668      |
| 13     | MTC-2 (m)         | vGLUT2         | 116    | 0.53421438  |            |                |        |             |
| 14     | MTC-3 (n)         | vGLUT3         | 67     | 0.31828228  |            |                |        |             |
| 15     | OSN (o)           | nr             | 1200   | 5.81826631  | % Total    |                |        | 82.288804   |
| 16     | Trachea (p)       | nr             | 2085   | 9.87922021  | PGC        |                |        | 16.1289897  |
| 17     | Immature (q)      | nr             | 3810   | 17.8951922  | EPN-1 (r)  |                |        | 1.53820263  |
| 18     | Anterior-Like (s) | nr             | 2650   | 12.58571323 |            |                |        |             |

| Figure 53a  | Neuro      | Neuro2     | Neuro3     | Neuro4    | Neuro5     | Neuro6     |
|-------------|------------|------------|------------|-----------|------------|------------|
| 71.12621854 | 99.1814017 | 124.191117 | 173.743021 | 98.876267 | 182.511533 | 13.3611074 |
| 64.1262373  | 86.0275944 | 101.488104 | 163.842245 | 99.734982 | 188.932559 | 18.1544874 |

| Newt 254                 |           | Newt 254   |            | Newt 254   |            |
|--------------------------|-----------|------------|------------|------------|------------|
| VGAT-Cre x Rhodopsin-DTR | 87.780782 | 84.5185716 | 80.2605538 | 81.5178844 | 89.9598789 |
| VGAT-Cre x Rhodopsin-DTR | 78.882742 | 77.7919786 | 68.0426768 | 79.83392   | 89.9598782 |

| Figure 53b | sga4      | hsp       | vglut1     | vglut2      | Dgat1-cre6 | GRD1       | GRD2       | Ngn2       | Ngn3       | LMTM1      | LMTM2      | LMTM3      | LMTM4      | Chol1      | Chol2      | Chol4      | Ngh1       | Ngh2       | Ngh3       | Ngh4       | Cart0      | Cart1      | Fam19a1    | Fam19a2    | Fam19a3    |
|------------|-----------|-----------|------------|-------------|------------|------------|------------|------------|------------|------------|------------|------------|------------|------------|------------|------------|------------|------------|------------|------------|------------|------------|------------|------------|------------|
| 1.3248151  | 2.358993  | 216.06481 | 1.44791383 | 74.05410775 | 79.1848688 | 13.262568  | 77.4622652 | 79.4991862 | 105.028284 | 10.6024128 | 113.412944 | 142.828714 | 110.915268 | 28.7720436 | 130.869255 | 2.9720944  | 151.823795 | 110.262878 | 89.4568832 | 43.5784137 | 81.731355  | 46.4374028 | 2.96889737 | 81.8818885 | 31.934031  |
| 7.34348152 | 7.0280725 | 195.94888 | 8.31610714 | 71.71963751 | 74.2983743 | 15.6517838 | 77.4680276 | 80.7705708 | 108.462088 | 18.6879289 | 95.7435501 | 132.564143 | 97.8978882 | 28.3073886 | 118.048155 | 14.4385551 | 155.28374  | 116.088718 | 64.2376581 | 56.348118  | 91.0590841 | 54.8881818 | 5.63181432 | 70.4320831 | 61.6188838 |

See info  
View  
Refresh

| New4-182a |           |           |          |
|-----------|-----------|-----------|----------|
| OB        | 22.297238 | 22.297232 | 0.000006 |
| CV        | 34.02442  | 34.793863 | 0.247989 |
| COV       | 14.320026 | 15.122889 | 0.000006 |
| ES        | 31.202026 | 30.823275 | 0.000006 |
| EW        | 28.148812 | 28.148812 | 0.000000 |
| MSD       | 22.187672 | 22.894489 | 0.103801 |

  

| New4-182a |           |           |          |
|-----------|-----------|-----------|----------|
| OB        | 28.285445 | 28.497395 | 0.000006 |
| CV        | 50.271348 | 48.484811 | 1.064238 |
| COV       | 41.40404  | 48.447174 | 0.000006 |
| ES        | 54.251411 | 51.887782 | 1.681766 |
| EW        | 51.41789  | 48.887178 | 0.000006 |
| MSD       | 41.581789 | 41.428187 | 0.022285 |

  

| New4-182a |           |           |           |
|-----------|-----------|-----------|-----------|
| OB        | 1.9727023 | 1.4819113 | 0.1770281 |
| CV        | 15.028129 | 14.20128  | 1.000007  |
| COV       | 8.191719  | 8.247702  | 0.000006  |
| ES        | 17.029129 | 17.300429 | 0.000006  |
| EW        | 17.029129 | 17.300429 | 0.000006  |
| MSD       | 1.5006929 | 1.7708178 | 0.113388  |

| New4-182a |           |           |           |
|-----------|-----------|-----------|-----------|
| OB        | 11.426208 | 10.287121 | 0.211786  |
| CV        | 3.1526273 | 9.2026126 | 0.0736626 |
| COV       | 4.820252  | 6.0281852 | 1.7719246 |
| ES        | 5.380215  | 2.2182864 | 0.0464728 |
| EW        | 0.9992512 | 1.4883984 | 1.4883984 |
| MSD       | 4.3812874 | 6.153854  | 0.5710284 |

  

| New4-182a |           |           |           |
|-----------|-----------|-----------|-----------|
| OB        | 2.9925281 | 2.1225287 | 0.1077804 |
| CV        | 4.8742688 | 3.9713827 | 1.0817111 |
| COV       | 8.1626708 | 7.2787788 | 1.4883984 |
| ES        | 8.810148  | 8.4922285 | 0.0772814 |
| EW        | 3.177878  | 2.6966717 | 1.6944117 |
| MSD       | 4.3898134 | 6.4762882 | 1.6944117 |

  

| New4-182a |           |           |           |
|-----------|-----------|-----------|-----------|
| OB        | 2.3049048 | 2.3776968 | 1.0887914 |
| CV        | 3.1534884 | 3.3847514 | 1.3428828 |
| COV       | 4.8428708 | 4.2327368 | 4.9440114 |
| ES        | 3.177778  | 3.702728  | 0         |
| EW        | 2.8171878 | 2.9747368 | 1.5442228 |
| MSD       | 2.3892581 | 2.8882127 | 2.8188828 |

Figure 54D

|      | OB        | CV        | COV       | ES       | EW       | MSD       |
|------|-----------|-----------|-----------|----------|----------|-----------|
| New1 | 31.802567 | 42.185483 | 39.058421 | 0        | 0        | 0         |
|      | 37.47172  | 24.424891 | 24.424891 | 0        | 0        | 0         |
|      | 57.291204 | 44.572304 | 56.818333 | 0        | 0        | 0         |
| New2 | 81.80789  | 82.963986 | 81.80789  | 0        | 0        | 0         |
|      | 73.78178  | 71.824839 | 71.824839 | 0        | 0        | 0         |
|      | 41.588143 | 47.320219 | 46.344534 | 0        | 0        | 0         |
| New3 | 1.831178  | 4.897847  | 3.756458  | 0.353707 | 0.363774 | 0.6712421 |
|      | 1.831178  | 1.238484  | 1.6558487 | 4.796209 | 3.678163 | 5.2911884 |
|      | 13.84178  | 16.721864 | 23.455867 | 2.828242 | 5.839121 | 11.118786 |

Figure 54E

|      | OB       | CV        | COV       | ES       | EW       | MSD       |
|------|----------|-----------|-----------|----------|----------|-----------|
| New4 | 1.831178 | 4.897847  | 3.756458  | 0.353707 | 0.363774 | 0.6712421 |
|      | 1.831178 | 1.238484  | 1.6558487 | 4.796209 | 3.678163 | 5.2911884 |
|      | 13.84178 | 16.721864 | 23.455867 | 2.828242 | 5.839121 | 11.118786 |

Figure 54F

|      | OB       | CV        | COV       | ES       | EW       | MSD       |
|------|----------|-----------|-----------|----------|----------|-----------|
| New5 | 1.831178 | 4.897847  | 3.756458  | 0.353707 | 0.363774 | 0.6712421 |
|      | 1.831178 | 1.238484  | 1.6558487 | 4.796209 | 3.678163 | 5.2911884 |
|      | 13.84178 | 16.721864 | 23.455867 | 2.828242 | 5.839121 | 11.118786 |

Figure 54G

|      | OB       | CV        | COV       | ES       | EW       | MSD       |
|------|----------|-----------|-----------|----------|----------|-----------|
| New6 | 1.831178 | 4.897847  | 3.756458  | 0.353707 | 0.363774 | 0.6712421 |
|      | 1.831178 | 1.238484  | 1.6558487 | 4.796209 | 3.678163 | 5.2911884 |
|      | 13.84178 | 16.721864 | 23.455867 | 2.828242 | 5.839121 | 11.118786 |

Figure 54H

|      | OB       | CV        | COV       | ES       | EW       | MSD       |
|------|----------|-----------|-----------|----------|----------|-----------|
| New7 | 1.831178 | 4.897847  | 3.756458  | 0.353707 | 0.363774 | 0.6712421 |
|      | 1.831178 | 1.238484  | 1.6558487 | 4.796209 | 3.678163 | 5.2911884 |
|      | 13.84178 | 16.721864 | 23.455867 | 2.828242 | 5.839121 | 11.118786 |

Figure 54I

|      | OB       | CV        | COV       | ES       | EW       | MSD       |
|------|----------|-----------|-----------|----------|----------|-----------|
| New8 | 1.831178 | 4.897847  | 3.756458  | 0.353707 | 0.363774 | 0.6712421 |
|      | 1.831178 | 1.238484  | 1.6558487 | 4.796209 | 3.678163 | 5.2911884 |
|      | 13.84178 | 16.721864 | 23.455867 | 2.828242 | 5.839121 | 11.118786 |

Figure 54J

|      | OB       | CV        | COV       | ES       | EW       | MSD       |
|------|----------|-----------|-----------|----------|----------|-----------|
| New9 | 1.831178 | 4.897847  | 3.756458  | 0.353707 | 0.363774 | 0.6712421 |
|      | 1.831178 | 1.238484  | 1.6558487 | 4.796209 | 3.678163 | 5.2911884 |
|      | 13.84178 | 16.721864 | 23.455867 | 2.828242 | 5.839121 | 11.118786 |

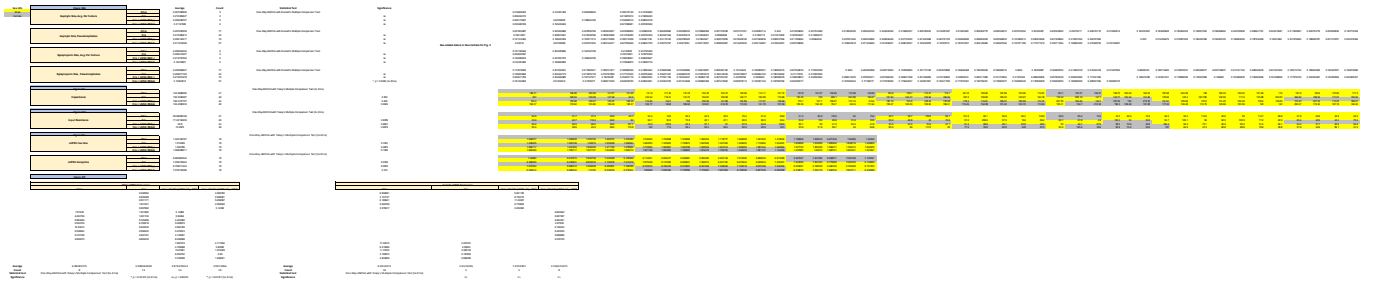



... ..  
... ..  
... ..  
... ..

| Group | Mean    | SD      |
|-------|---------|---------|
| 1     | 142.389 | 142.330 |
| 2     | 142.389 | 142.330 |
| 3     | 142.389 | 142.330 |
| 4     | 142.389 | 142.330 |
| 5     | 142.389 | 142.330 |
| 6     | 142.389 | 142.330 |
| 7     | 142.389 | 142.330 |
| 8     | 142.389 | 142.330 |
| 9     | 142.389 | 142.330 |
| 10    | 142.389 | 142.330 |

Average Count: 142.389, 142.330  
 Statistical Test: Two-tailed unpaired parametric t-test  
 t value: 0.000000  
 df: 18  
 Significance: 0.999999

| Group | Mean    | SD      |
|-------|---------|---------|
| 1     | 142.389 | 142.330 |
| 2     | 142.389 | 142.330 |
| 3     | 142.389 | 142.330 |
| 4     | 142.389 | 142.330 |
| 5     | 142.389 | 142.330 |
| 6     | 142.389 | 142.330 |
| 7     | 142.389 | 142.330 |
| 8     | 142.389 | 142.330 |
| 9     | 142.389 | 142.330 |
| 10    | 142.389 | 142.330 |

Average Count: 142.389, 142.330  
 Statistical Test: Two-tailed unpaired parametric t-test  
 t value: 0.0775  
 df: 18  
 Significance: 0.9822

| Group | Mean    | SD      |
|-------|---------|---------|
| 1     | 142.389 | 142.330 |
| 2     | 142.389 | 142.330 |
| 3     | 142.389 | 142.330 |
| 4     | 142.389 | 142.330 |
| 5     | 142.389 | 142.330 |
| 6     | 142.389 | 142.330 |
| 7     | 142.389 | 142.330 |
| 8     | 142.389 | 142.330 |
| 9     | 142.389 | 142.330 |
| 10    | 142.389 | 142.330 |

| Group | Mean    | SD      |
|-------|---------|---------|
| 1     | 142.389 | 142.330 |
| 2     | 142.389 | 142.330 |
| 3     | 142.389 | 142.330 |
| 4     | 142.389 | 142.330 |
| 5     | 142.389 | 142.330 |
| 6     | 142.389 | 142.330 |
| 7     | 142.389 | 142.330 |
| 8     | 142.389 | 142.330 |
| 9     | 142.389 | 142.330 |
| 10    | 142.389 | 142.330 |

| Group | Count   | Average | Count   | Average | Count | Significance |
|-------|---------|---------|---------|---------|-------|--------------|
| 1     | 0.00125 | 10      | 0.00125 | 10      |       | 0.0000       |
| 2     | 0.00125 | 10      | 0.00125 | 10      |       | 0.0000       |
| 3     | 0.00125 | 10      | 0.00125 | 10      |       | 0.0000       |
| 4     | 0.00125 | 10      | 0.00125 | 10      |       | 0.0000       |
| 5     | 0.00125 | 10      | 0.00125 | 10      |       | 0.0000       |
| 6     | 0.00125 | 10      | 0.00125 | 10      |       | 0.0000       |
| 7     | 0.00125 | 10      | 0.00125 | 10      |       | 0.0000       |
| 8     | 0.00125 | 10      | 0.00125 | 10      |       | 0.0000       |
| 9     | 0.00125 | 10      | 0.00125 | 10      |       | 0.0000       |
| 10    | 0.00125 | 10      | 0.00125 | 10      |       | 0.0000       |

Two-way ANOVA with Bonferroni Multiple comparisons test at each stimulus intensity (df=9 vs. Cor p value=0.0000)

| Group | Mean    | SD      |
|-------|---------|---------|
| 1     | 142.389 | 142.330 |
| 2     | 142.389 | 142.330 |
| 3     | 142.389 | 142.330 |
| 4     | 142.389 | 142.330 |
| 5     | 142.389 | 142.330 |
| 6     | 142.389 | 142.330 |
| 7     | 142.389 | 142.330 |
| 8     | 142.389 | 142.330 |
| 9     | 142.389 | 142.330 |
| 10    | 142.389 | 142.330 |

Average Count: 142.389, 142.330  
 Statistical Test: Two-tailed unpaired parametric t-test  
 t value: 0.2734  
 df: 18  
 Significance: 0.7845

| Group | Mean    | SD      |
|-------|---------|---------|
| 1     | 142.389 | 142.330 |
| 2     | 142.389 | 142.330 |
| 3     | 142.389 | 142.330 |
| 4     | 142.389 | 142.330 |
| 5     | 142.389 | 142.330 |
| 6     | 142.389 | 142.330 |
| 7     | 142.389 | 142.330 |
| 8     | 142.389 | 142.330 |
| 9     | 142.389 | 142.330 |
| 10    | 142.389 | 142.330 |

Average Count: 142.389, 142.330  
 Statistical Test: Two-tailed unpaired parametric t-test  
 t value: 0.1170  
 df: 18  
 Significance: 0.9129

| Group | Mean    | SD      |
|-------|---------|---------|
| 1     | 142.389 | 142.330 |
| 2     | 142.389 | 142.330 |
| 3     | 142.389 | 142.330 |
| 4     | 142.389 | 142.330 |
| 5     | 142.389 | 142.330 |
| 6     | 142.389 | 142.330 |
| 7     | 142.389 | 142.330 |
| 8     | 142.389 | 142.330 |
| 9     | 142.389 | 142.330 |
| 10    | 142.389 | 142.330 |

Average Count: 142.389, 142.330  
 Statistical Test: Two-tailed unpaired parametric t-test  
 t value: 0.0522  
 df: 18  
 Significance: 0.9583

| Group | Mean    | SD      |
|-------|---------|---------|
| 1     | 142.389 | 142.330 |
| 2     | 142.389 | 142.330 |
| 3     | 142.389 | 142.330 |
| 4     | 142.389 | 142.330 |
| 5     | 142.389 | 142.330 |
| 6     | 142.389 | 142.330 |
| 7     | 142.389 | 142.330 |
| 8     | 142.389 | 142.330 |
| 9     | 142.389 | 142.330 |
| 10    | 142.389 | 142.330 |

| Group | Mean    | SD      |
|-------|---------|---------|
| 1     | 142.389 | 142.330 |
| 2     | 142.389 | 142.330 |
| 3     | 142.389 | 142.330 |
| 4     | 142.389 | 142.330 |
| 5     | 142.389 | 142.330 |
| 6     | 142.389 | 142.330 |
| 7     | 142.389 | 142.330 |
| 8     | 142.389 | 142.330 |
| 9     | 142.389 | 142.330 |
| 10    | 142.389 | 142.330 |

| Group | Count   | Average | Count   | Average | Count | Significance |
|-------|---------|---------|---------|---------|-------|--------------|
| 1     | 0.00125 | 10      | 0.00125 | 10      |       | 0.0000       |
| 2     | 0.00125 | 10      | 0.00125 | 10      |       | 0.0000       |
| 3     | 0.00125 | 10      | 0.00125 | 10      |       | 0.0000       |
| 4     | 0.00125 | 10      | 0.00125 | 10      |       | 0.0000       |
| 5     | 0.00125 | 10      | 0.00125 | 10      |       | 0.0000       |
| 6     | 0.00125 | 10      | 0.00125 | 10      |       | 0.0000       |
| 7     | 0.00125 | 10      | 0.00125 | 10      |       | 0.0000       |
| 8     | 0.00125 | 10      | 0.00125 | 10      |       | 0.0000       |
| 9     | 0.00125 | 10      | 0.00125 | 10      |       | 0.0000       |
| 10    | 0.00125 | 10      | 0.00125 | 10      |       | 0.0000       |

Two-way ANOVA with Bonferroni Multiple comparisons test at each PPR interval (df=9 vs. Cor p value=0.0000)



**Sex Info**

|                   |                                                | 2 males, 1 female | female     | female     |
|-------------------|------------------------------------------------|-------------------|------------|------------|
| <b>Figure S8e</b> | % Gephyrin with Dystroglycan (avg. per animal) | 10"               | 20"        | O/N        |
|                   |                                                | 36.4929513        | 26.5676373 | 5.69961144 |
|                   |                                                | 20.72548408       |            |            |
|                   |                                                | 25.93236631       |            |            |
| <b>Average</b>    | 27.7169339                                     | 26.5676373        | 5.69961144 |            |
| <b>Count</b>      | 3                                              | 1                 | 1          |            |

|                   |                                                   | 10"            | 20"         | O/N         |
|-------------------|---------------------------------------------------|----------------|-------------|-------------|
| <b>Figure S8f</b> | Gephyrin Size with Dystroglycan (avg. per animal) | 0.048988203    | 0.047410739 | 0.038281746 |
|                   |                                                   | 0.043506626    |             |             |
|                   |                                                   | 0.049433426    |             |             |
|                   |                                                   | <b>Average</b> | 0.047309418 | 0.047410739 |
| <b>Count</b>      | 3                                                 | 1              | 1           |             |

|              |                                                      | 10"            | 20"         | O/N         |
|--------------|------------------------------------------------------|----------------|-------------|-------------|
|              | Gephyrin Size without Dystroglycan (avg. per animal) | 0.027810297    | 0.017452976 | 0.017541977 |
|              |                                                      | 0.021896803    |             |             |
|              |                                                      | 0.019119668    |             |             |
|              |                                                      | <b>Average</b> | 0.022942256 | 0.017452976 |
| <b>Count</b> | 3                                                    | 1              | 1           |             |

|                   |                                            | 10"            | 20"         | O/N         |
|-------------------|--------------------------------------------|----------------|-------------|-------------|
| <b>Figure S8g</b> | Dystroglycan Puncta Size (avg. per animal) | 0.023284233    | 0.015653814 | 0.009445584 |
|                   |                                            | 0.018735656    |             |             |
|                   |                                            | 0.016995115    |             |             |
|                   |                                            | <b>Average</b> | 0.019671668 | 0.015653814 |
| <b>Count</b>      | 3                                          | 1              | 1           |             |

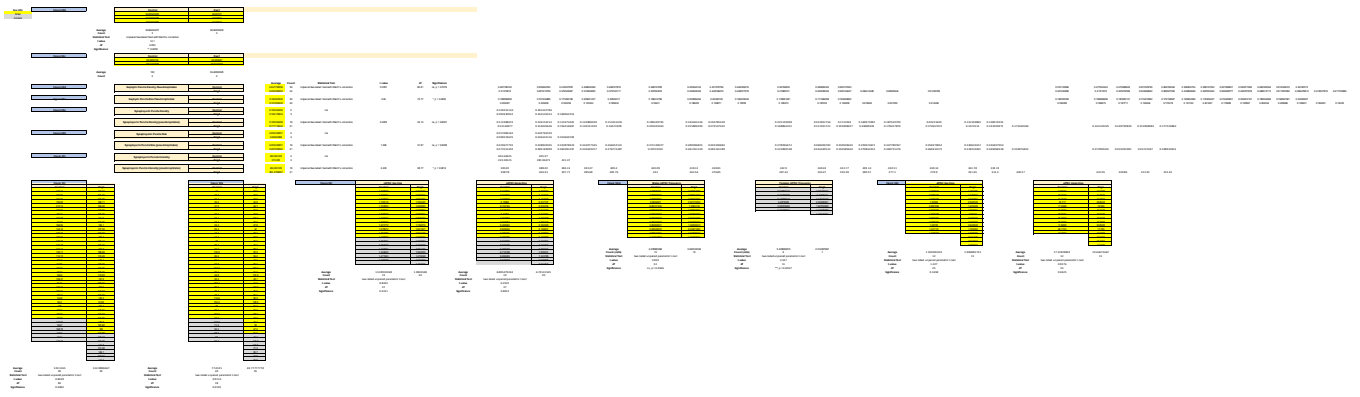

|||||
